# Supplementary material for: Nannofossils from the Middle Eocene Sabiñánigo Sandstone Formation in the Jaca Basin (southern Pyrenees): biostratigraphy and paleoenvironmental implications
Source: Copernicus journal article supplement (doi:10.5194/jm-43-55-2024), 2024-04-11
Supplement: Supplementary file 1 [file jm-43-55-2024-supplement.zip]

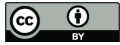

*Supplement of*

**Nannofossils from the Middle Eocene Sabinánigo Sandstone Formation in the Jaca Basin (southern Pyrenees): biostratigraphy and paleoenvironmental implications**

**Elizabeth R. Lasluisa et al.**

*Correspondence to:* Elizabeth R. Lasluisa ([lasluisae@usal.es](mailto:lasluisae@usal.es))

- [jm-43-55-2024-supplement-title-page.pdf](#)
- [Table S1. General counts.xlsx](#)

The copyright of individual parts of the supplement might differ from the article licence.
