# Supplementary material for: Nannofossils from the Middle Eocene Sabiñánigo Sandstone Formation in the Jaca Basin (southern Pyrenees): biostratigraphy and paleoenvironmental implications
Source: Copernicus journal article supplement (doi:10.5194/jm-43-55-2024), 2024-04-11
Supplement: Supplementary file 1 [file Table S1. General counts.xlsx]

## Sheet:  GENERAL COUNT
						AUTOCHTHONOUS
						>1%													1-0.001%
	INTERVAL	(m)		PRESERVATION	Visual fields	Cyclicargolithus floridanus	Reticulofenestra stavensis	Reticulofenestra bisecta	Coccolithus formosus	Coccolithus pelagicus	Clausicoccus fenestratus	Blackites inversus	Blackites sp.	Blackites subtilis	Blackites tenuis	Blackites stilus	Zygrhablithus bijugatus	Cribrocentrum reticulatum	Sphenolithus sp.	Sphenolithus radians	Sphenolithus spiniger	Sphenolithus moriformis	Reticulofenestra dictyoda	Reticulofenestra umbilicus	Chiasmolithus solitus	Chiasmolithus medius	Chiasmolithus grandis	Chiasmolithus modestus	Discoaster binodosus	Discoaster tanii	Discoaster williamsii	Discoaster barbadiensis	Discoaster gemmifer	Pemma basquense	Pemma sp	Sphenolithus obtusus	Helicosphaera ibramlettei	Micrantholithus astrum	Braarudosphaera sequela	Braarudosphaera bigelowii	RICH	TOTAL AUTOCHTHONOUS X SAMPLE	∑ AUTO X Intervals				INTERVAL	(m)
	E	88-130	LATAS 29	P	1000	7		1			5					3	12	3			0																				7	31	1499				E	88-130	LATAS 29
			LATAS 28	M	950	12			4	6	8		2				18	20		1	1	1		5										2		1	2				14	83							LATAS 28
			LATAS 27	M	980	15	2	9	5	35	31					6	36			1	0	1		2			1							1							14	145							LATAS 27
			LATAS 26	M	900	98	6	11	47	102	44					23	81			1	2	1		1		1							1				1	1		6	17	427							LATAS 26
			LATAS 25	M	1100	5		3	3	14	5					3	20	3	1		0	1																		3	12	61							LATAS 25
			LATAS 24	M	1100	44		10	20	42	35					6	37	4		2	0			6													2			4	13	212							LATAS 24
			LATAS 23	M	1100	112	4	37	39	147	33			21			101	16	1	1	1	1		7		1	1							3	3	1				10	20	540							LATAS 23
	D	63-88	LATDEN 11	M	950	92	6	29	39	83	66		12		3		54	14		1	1	2				1											3			2	16	408	2587				D	63-88	LATDEN 11
			LATDEN 10	M	980	49	3	24	34	71	95				2	8	86	9		1	1	2		4		1	1							2						6	18	399							LATDEN 10
			LATDEN 9	M	980	15		14	15	41	24		5			7	30	2	1	1	1																			3	13	159							LATDEN 9
			LATDEN 8	M	980	44	1	21	22	51	60	2	6				61	4	1	1	1														1					2	15	278							LATDEN 8
			LATDEN 7	M	980	11		4	6	12	15					7	14			2	0	2																		1	11	74							LATDEN 7
			LATDEN 6	M	1000	59	2	23	37	70	81	10				26	107	12	2	2	0			3		1									1		4	1	1	1	20	443							LATDEN 6
			LATDEN 5	M	1000	28	1	13	13	41	36					12		33		1	0	2													1					1	13	182							LATDEN 5
			LATDEN 4	M	900					12						4					0																				3	16							LATDEN 4
			LATDEN 3	M	900	6		10		21	20						17			2	0	2													1						9	79							LATDEN 3
			LATDEN 2	M	980	46	3	17	21	56	37				4	9	56	3	1	1	0	1		2		1										1	3			4	19	266							LATDEN 2
			LATAS 22	M	1000	31		4	11	44	14					8	23	27	1		0	5		2																3	13	173							LATAS 22
			LATDEN 1	P	900	5		4	8	9	10					5	5	6			0	2					1														11	55							LATDEN 1
			LATAS 21	M	1100	12	1	4		11	3			2			6	15	1		0																				10	55							LATAS 21
	C	13-63	LATAS 20	M	1000	74	2	5	37	81	16			3			14	84		5	1	2		6						1		1									15	332	2899				C	13-63	LATAS 20
			LATAS 19	M	980	55	2	7	3	43	12						8	52		3				5		1					1									1	13	193							LATAS 19
			LATAS 18	M	1100	111	4	14	14	85	31					3	30	24	1	4				2					1											2	14	326							LATAS 18
			LATAS 17	M	1000	124	3	16	10	61	27		5				25	15		5	2			5		1	1													3	15	303							LATAS 17
			LATAS 16	M	750	146	9	24	20	110	67				2	20	36			6		8		4			1	1											3	5	16	462							LATAS 16
			LATAS 15	M	1000	33			4	21	10						9	4		2		2		2																3	10	90							LATAS 15
			LATAS 14	M	900	61		11	5	27	14						13	5			2			5											1					3	11	147							LATAS 14
			LATAS 13	M	1400	29	1	2	3	17	21	3	2				7					2																			10	87							LATAS 13
			LATAS 12	M	925	51		6	5	30	30	4					16			2	1													1						1	11	147							LATAS 12
			LATAS 11	M	852	11	2	4	11	21	29		2	5		1	11	8		4		1																		3	14	113							LATAS 11
			LATAS 10	P	993	10		1	3	5	10		3				2																								7	34							LATAS 10
			LATAS 09	M	988	4	2		6	5	9						3															1								1	8	31							LATAS 09
			LATAS 08	M	985	24	5	20	18	41	40						21	5	1			1																1		4	12	181							LATAS 08
			LATAS 07	M	980	42	2	9	9	36	52		5		2		19	7		3																					11	186							LATAS 07
			LATAS 06	M	531	21		4	28	22	89			8		2	8			2	2	1					1	1	2					1	1					1	17	194							LATAS 06
			LATAS 05	M	870	12			8	5	41		3				4																								6	73							LATAS 05
	B	2-13	LATAS 04	P	774				1	1																															2	2	299				B	2-13	LATAS 04
			LATAS 03	M	650	16		1	22	26	67	5					8				1		1	2															4		11	153							LATAS 03
			LATAS 02	M	595	11		1	27	15	65		8				5		1	1	3			4					1										1	1	14	144							LATAS 02
	A	0-2	LATAS 01	M	995	14		1	18	16	23	4								1	3				3																9	83	83				A	0-2	LATAS 01
						1540	61	364	576	1536	1275	28	53	39	13	153	1003	375	12	56	23	40	1	67	3	8	7	2	4	1	1	2	1	10	9	3	15	3	9	74	494	7367
		G :Good preservation
		M: Moderate preservation
		P:Poor preservation
[truncated: 31 more columns]
