# Supplementary material for: Nannofossils from the Middle Eocene Sabiñánigo Sandstone Formation in the Jaca Basin (southern Pyrenees): biostratigraphy and paleoenvironmental implications
Source: Copernicus journal article supplement (doi:10.5194/jm-43-55-2024), 2024-04-11
Supplement: Supplementary file 2 [file jm-43-55-2024-supplement.zip]

Archive with 2 entries (2 files):
- Table S1. General counts.xlsx
- jm-43-55-2024-supplement-title-page.pdf
